# Supplementary material
Source: PubMed Central journal article supplement (PMC4663675)

# Supplementary Figure 1 (Humphries)

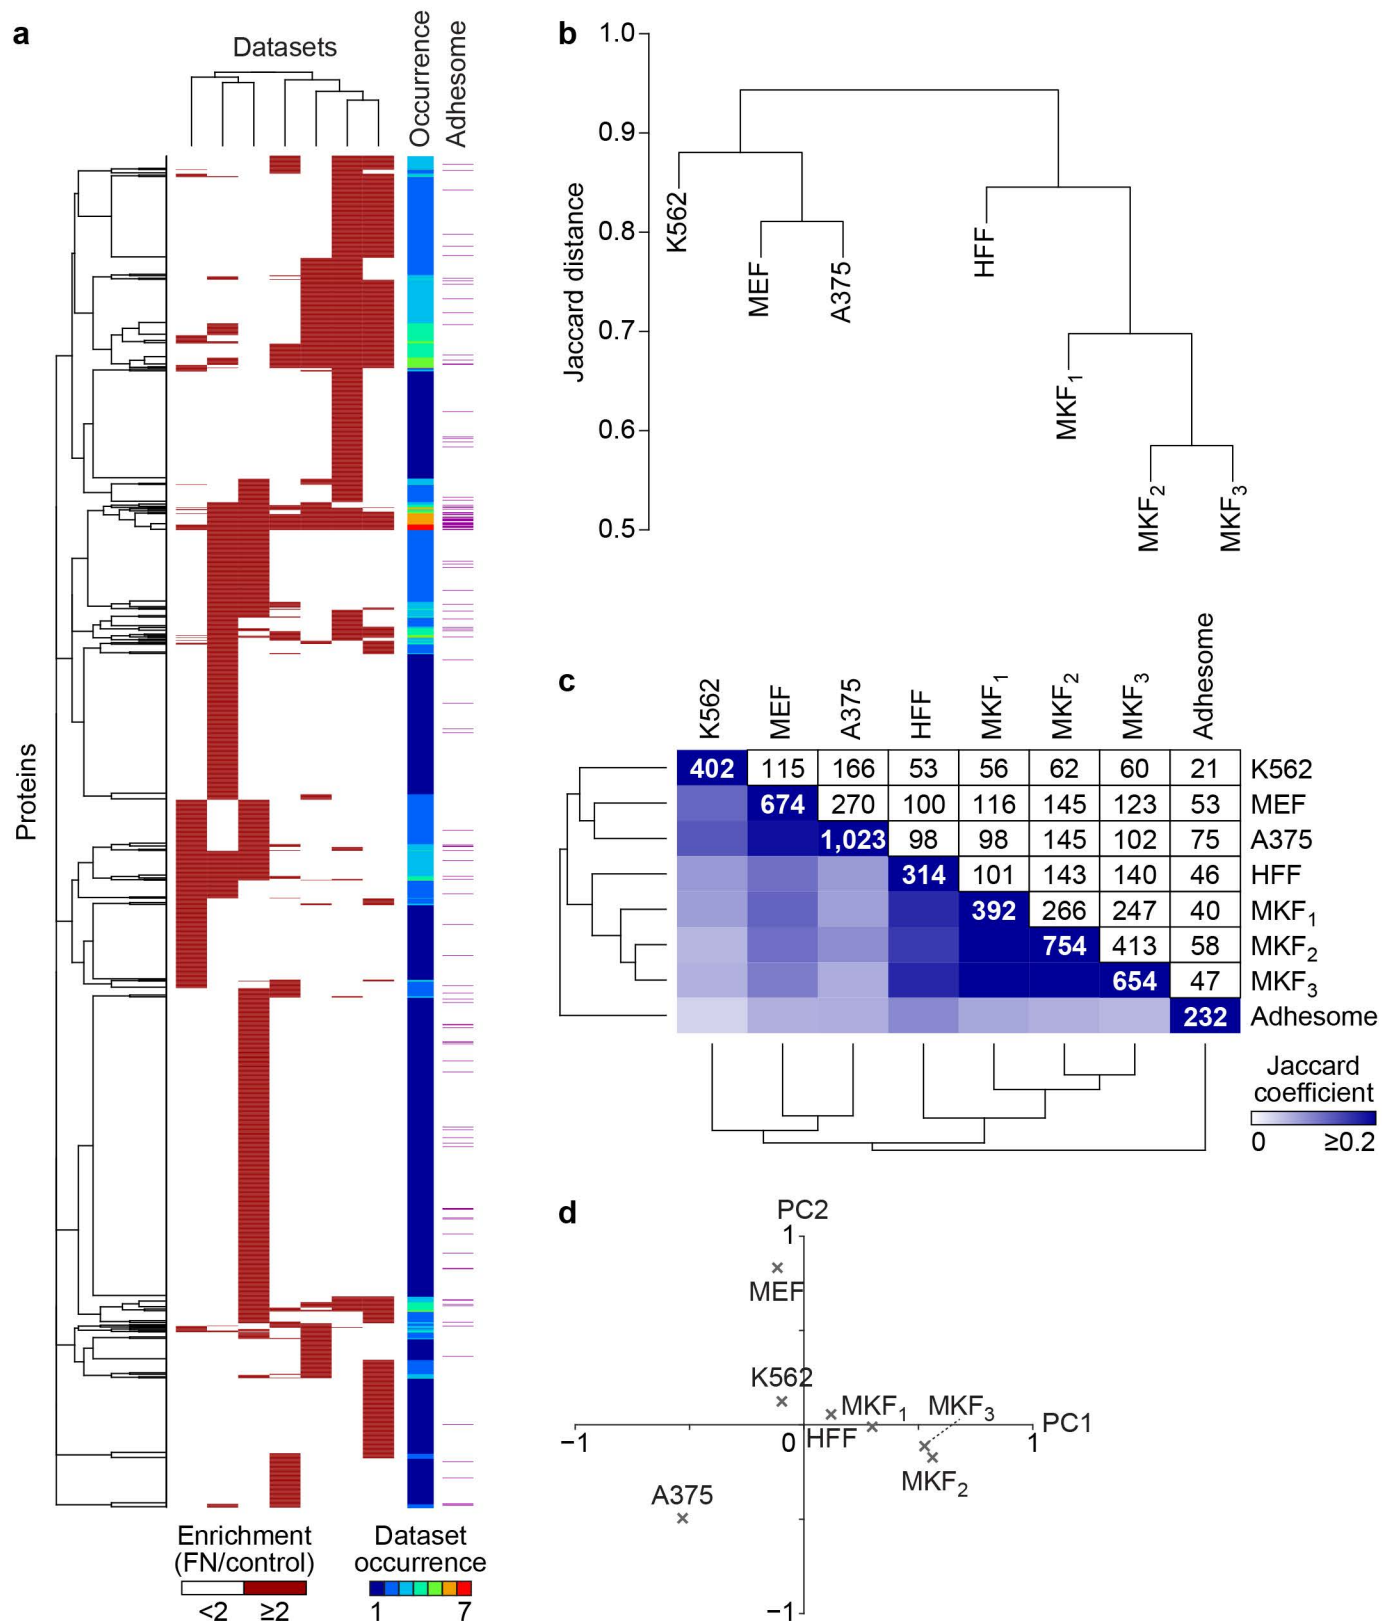

Supplement: NIHMS65191-supplement-Supplementary_Figure_1.pdf [file NIHMS65191-supplement-Supplementary_Figure_1.pdf]

# Supplementary Figure 2 (Humphries)

**a**

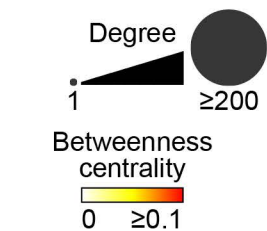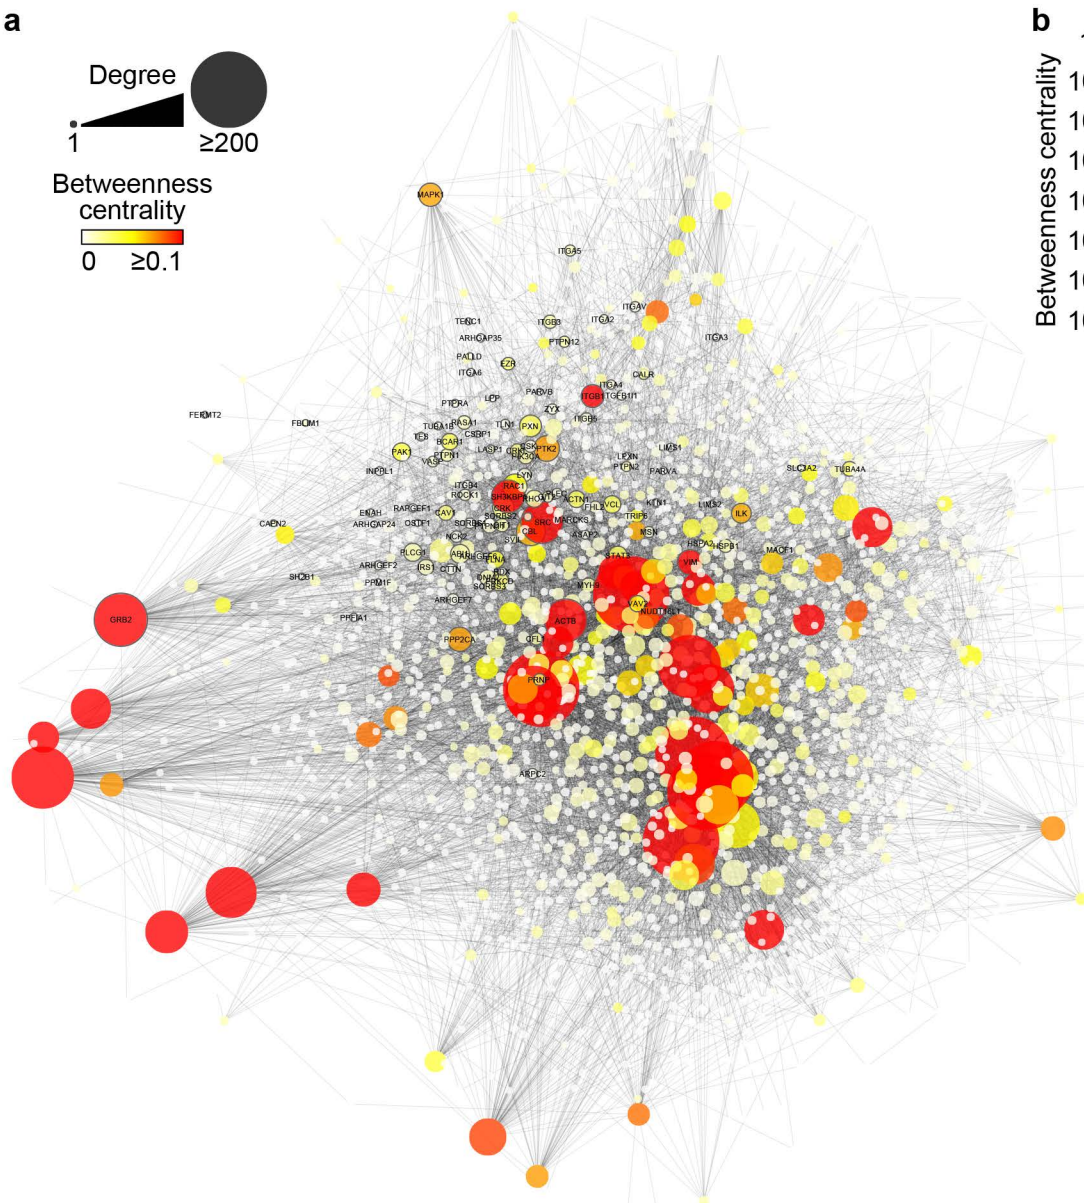

**b**

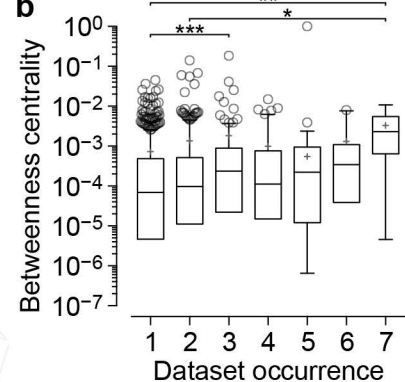

Supplement: NIHMS65191-supplement-Supplementary_Figure_2.pdf [file NIHMS65191-supplement-Supplementary_Figure_2.pdf]

# Supplementary Figure 3 (Humphries)

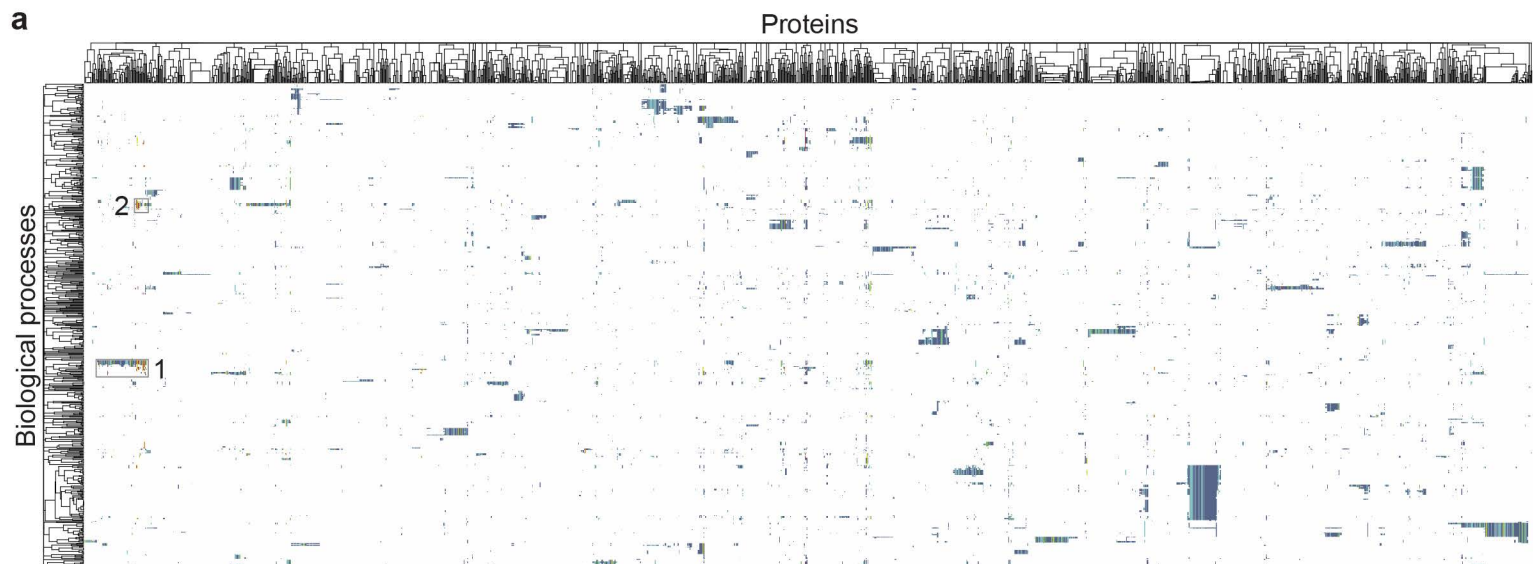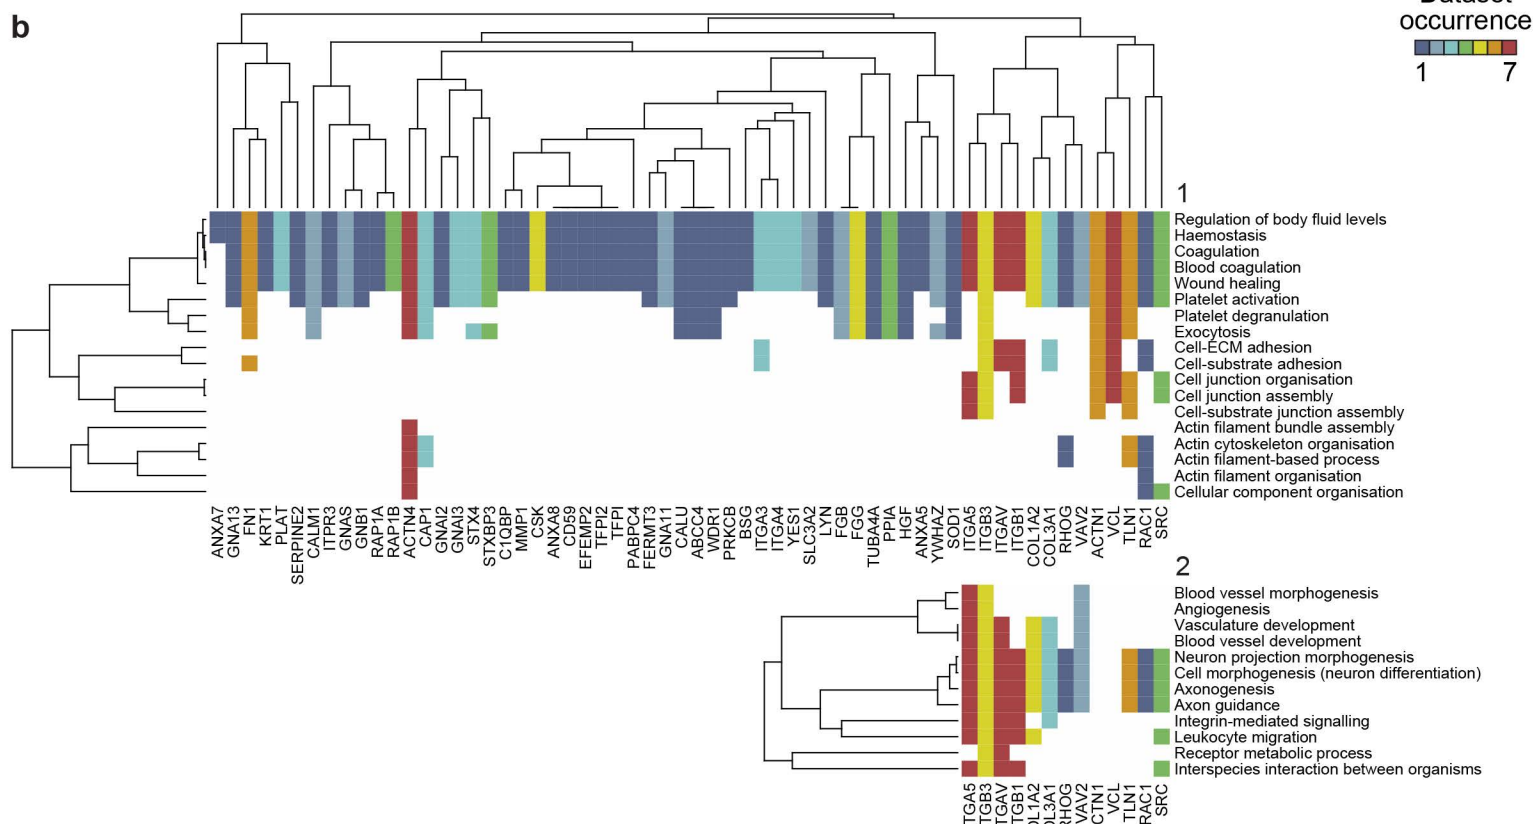

Supplement: NIHMS65191-supplement-Supplementary_Figure_3.pdf [file NIHMS65191-supplement-Supplementary_Figure_3.pdf]

# Supplementary Figure 4 (Humphries)

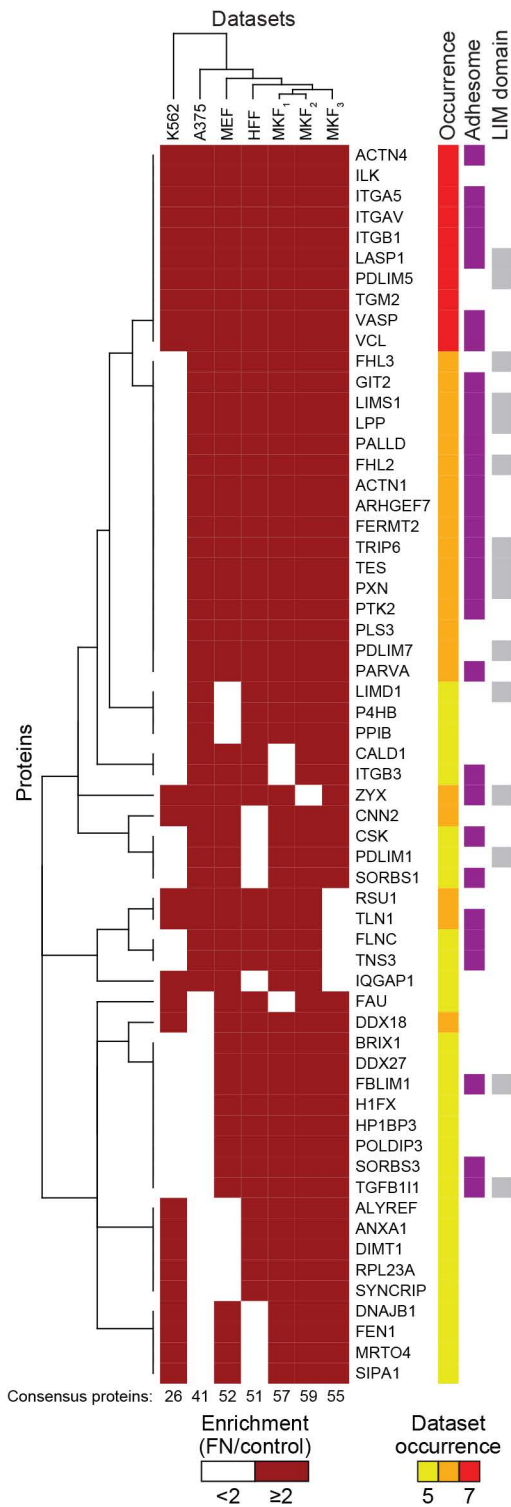

Supplement: NIHMS65191-supplement-Supplementary_Figure_4.pdf [file NIHMS65191-supplement-Supplementary_Figure_4.pdf]

# Supplementary Figure 5 (Humphries)

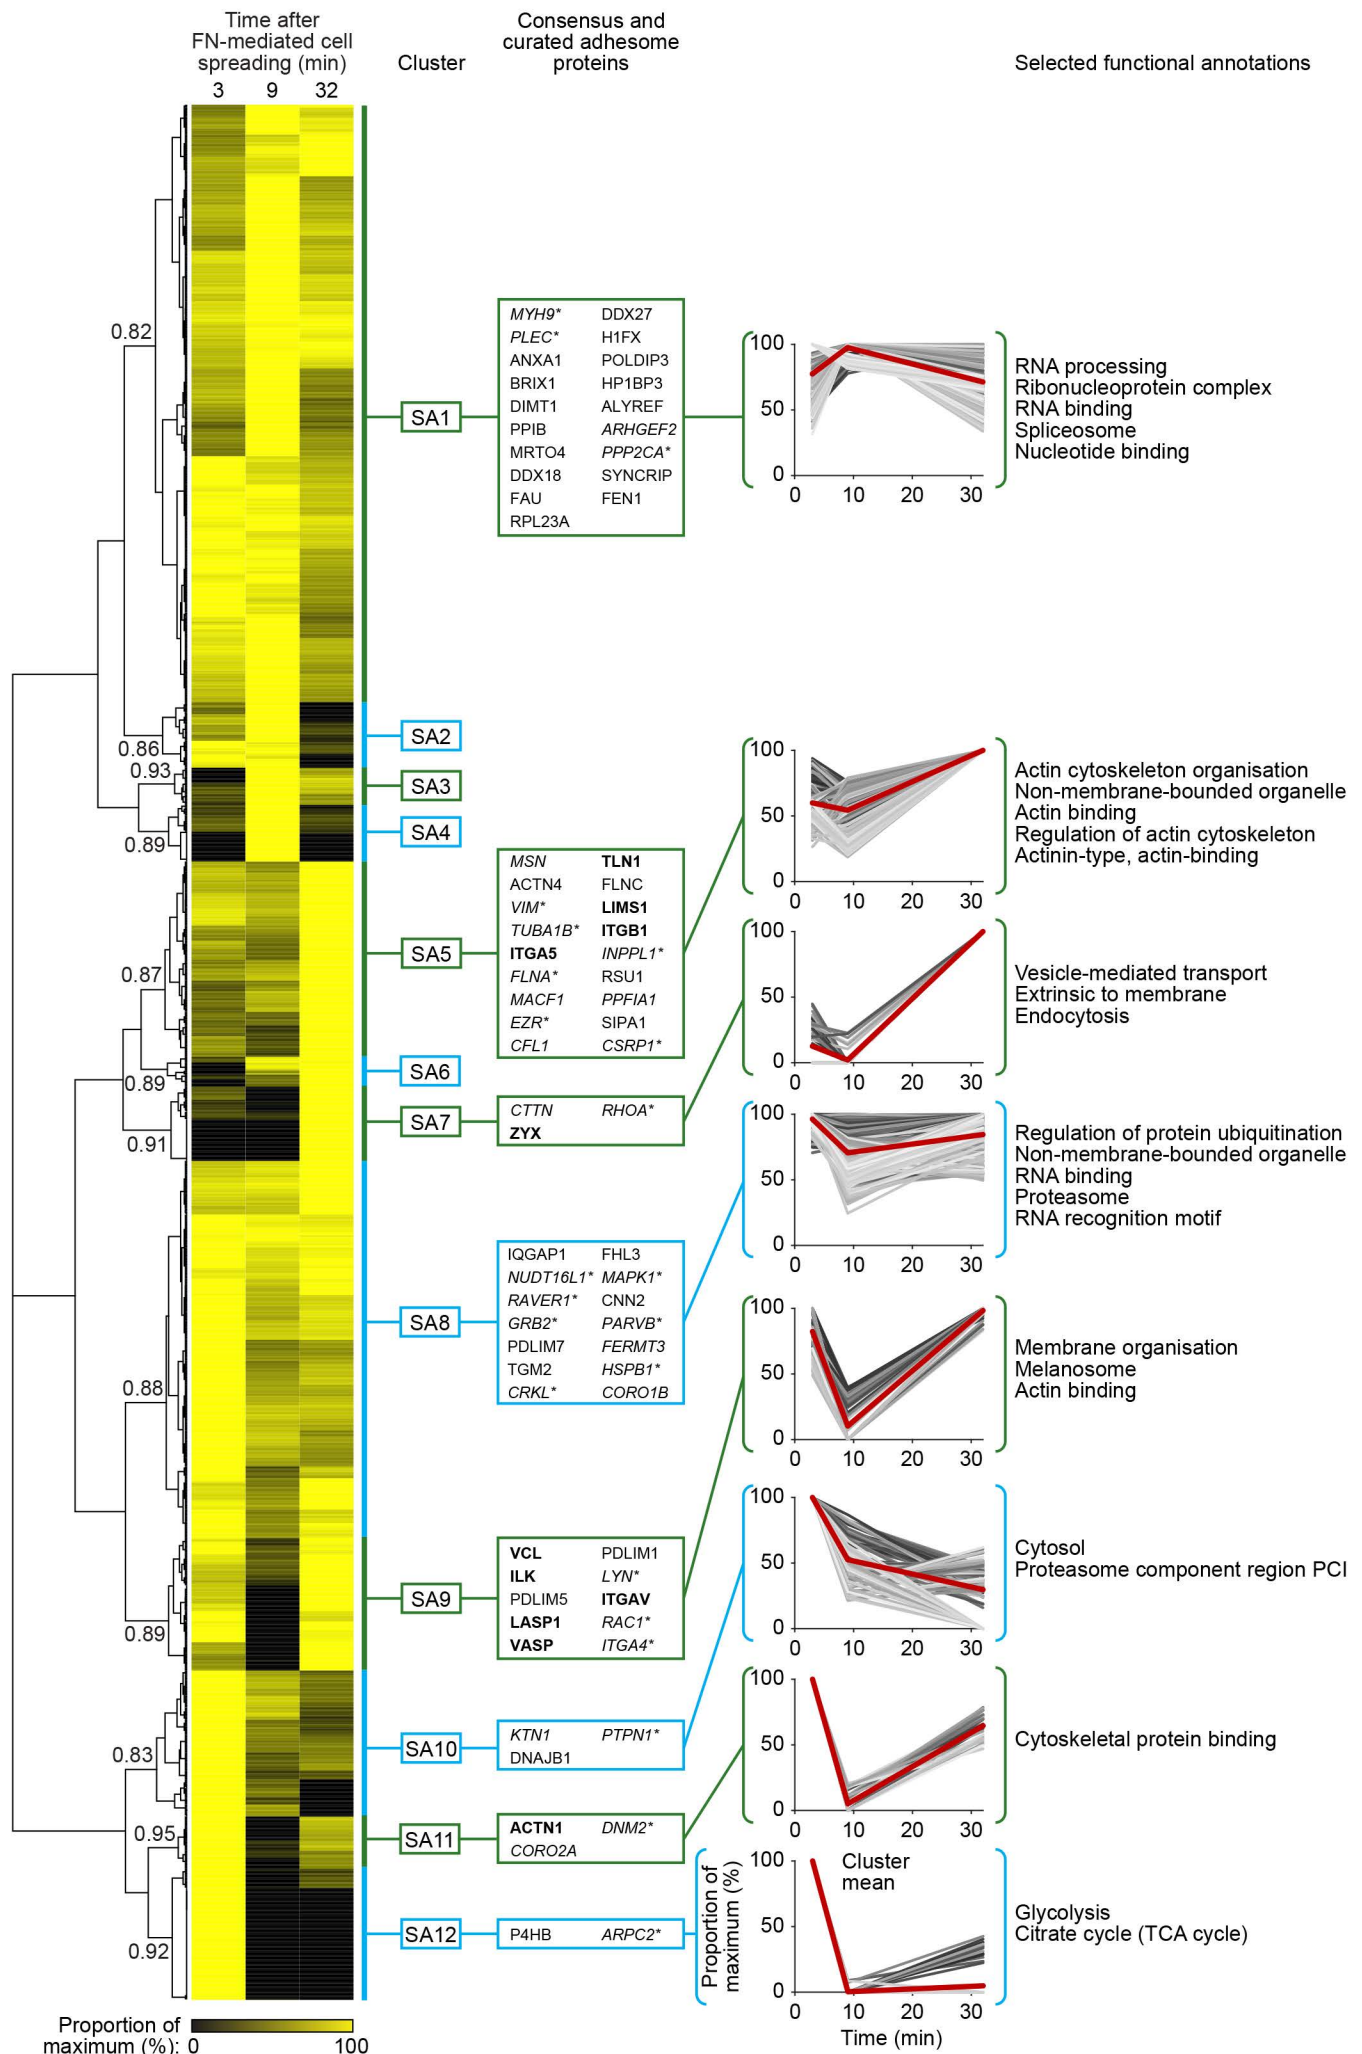

Supplement: NIHMS65191-supplement-Supplementary_Figure_5.pdf [file NIHMS65191-supplement-Supplementary_Figure_5.pdf]

# Supplementary Figure 6 (Humphries)

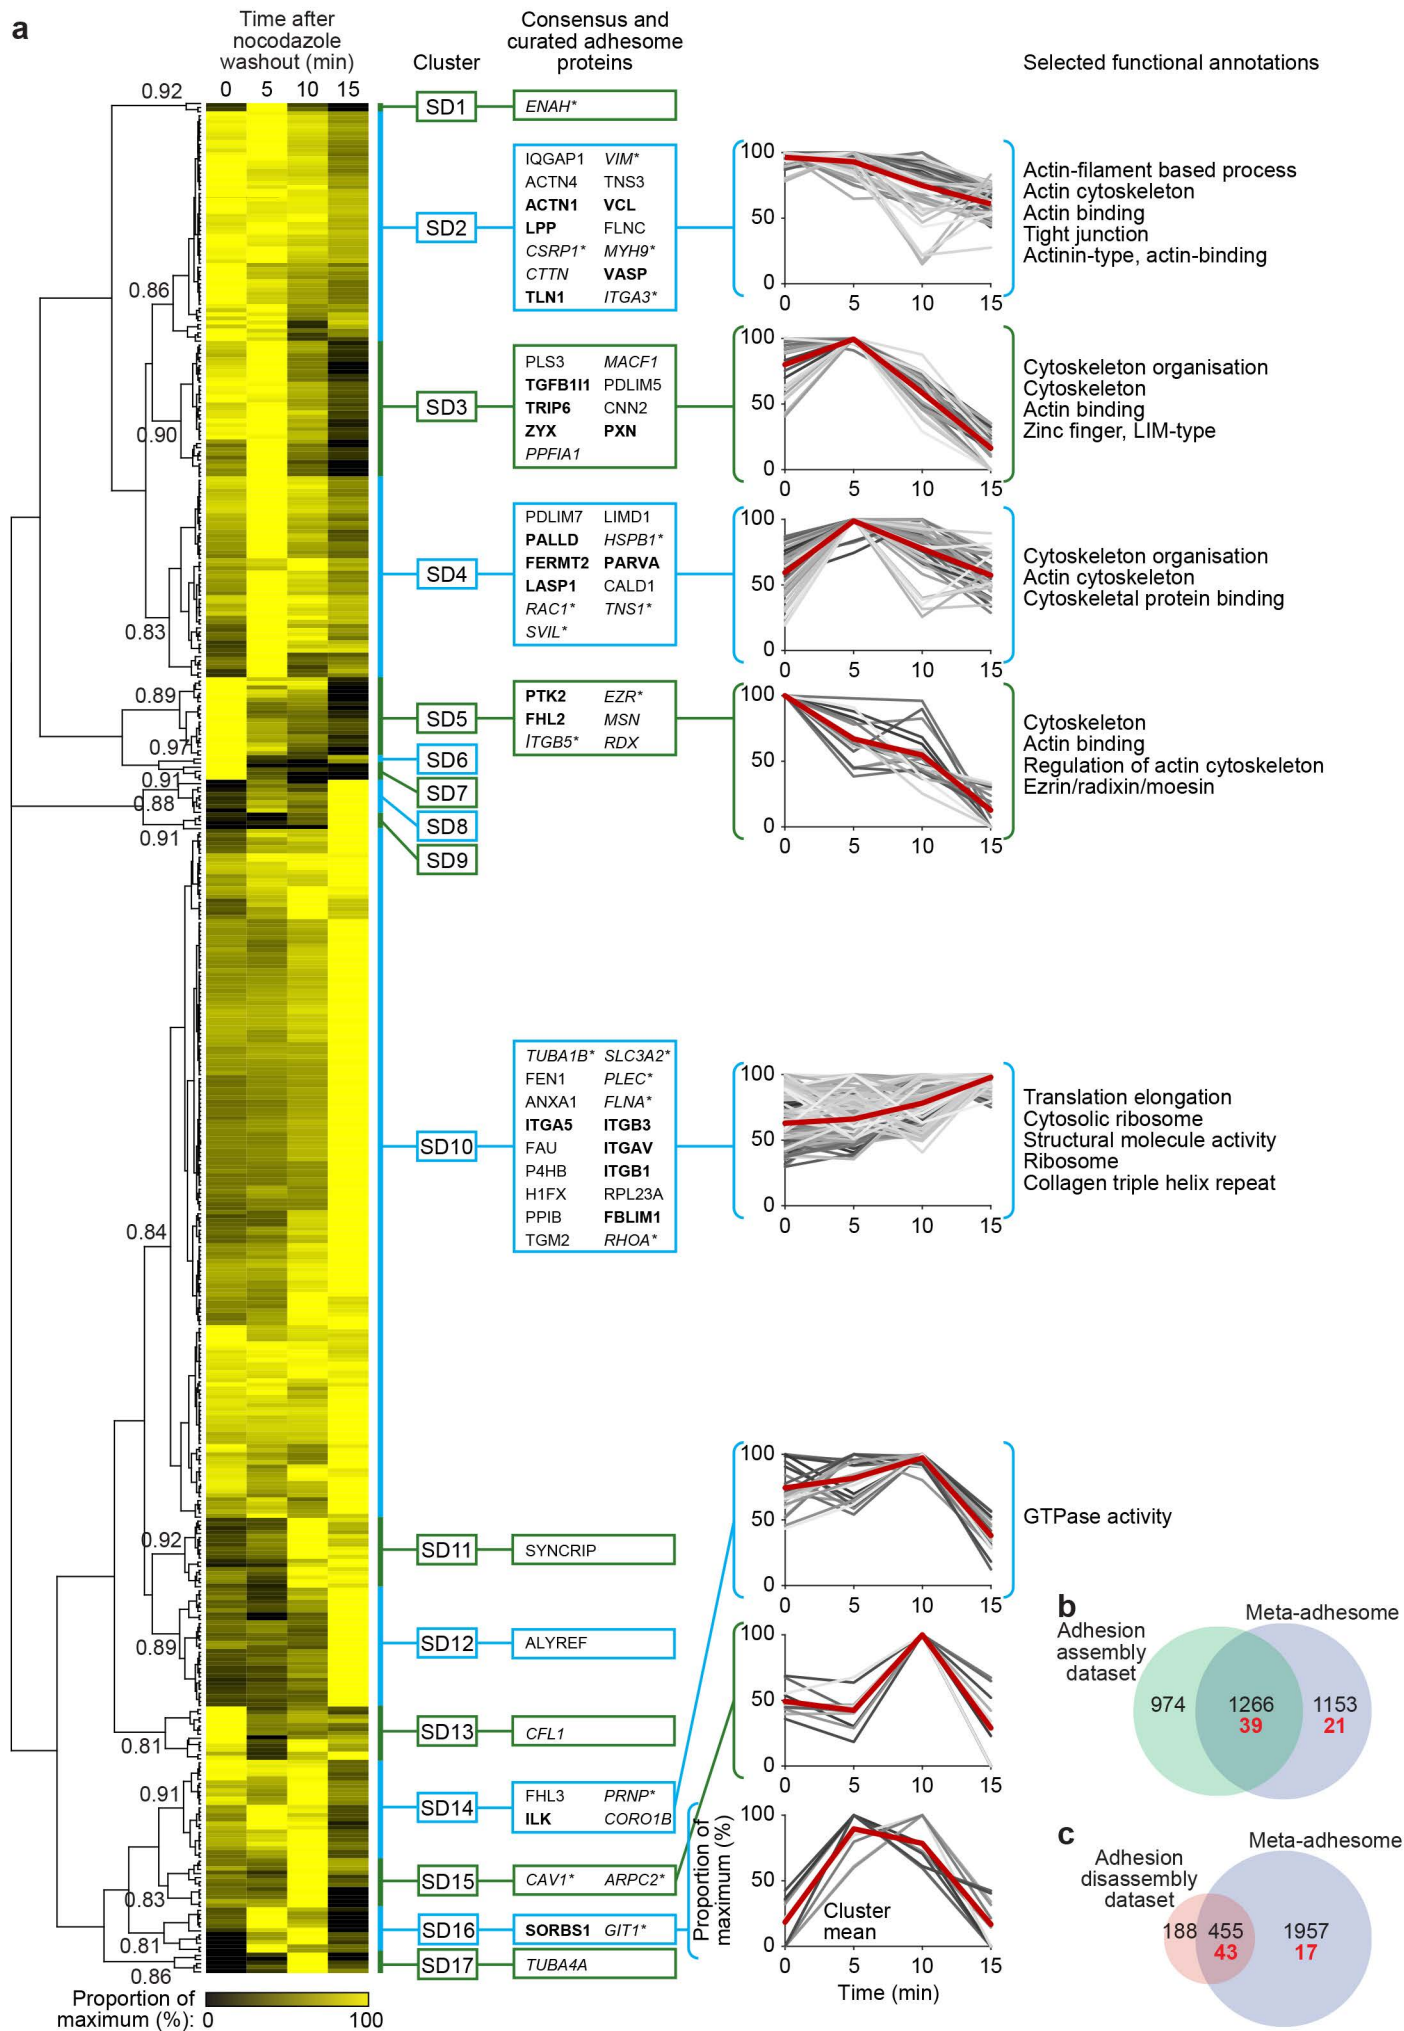

Supplement: NIHMS65191-supplement-Supplementary_Figure_6.pdf [file NIHMS65191-supplement-Supplementary_Figure_6.pdf]

# Supplementary Figure 7 (Humphries)

**a**

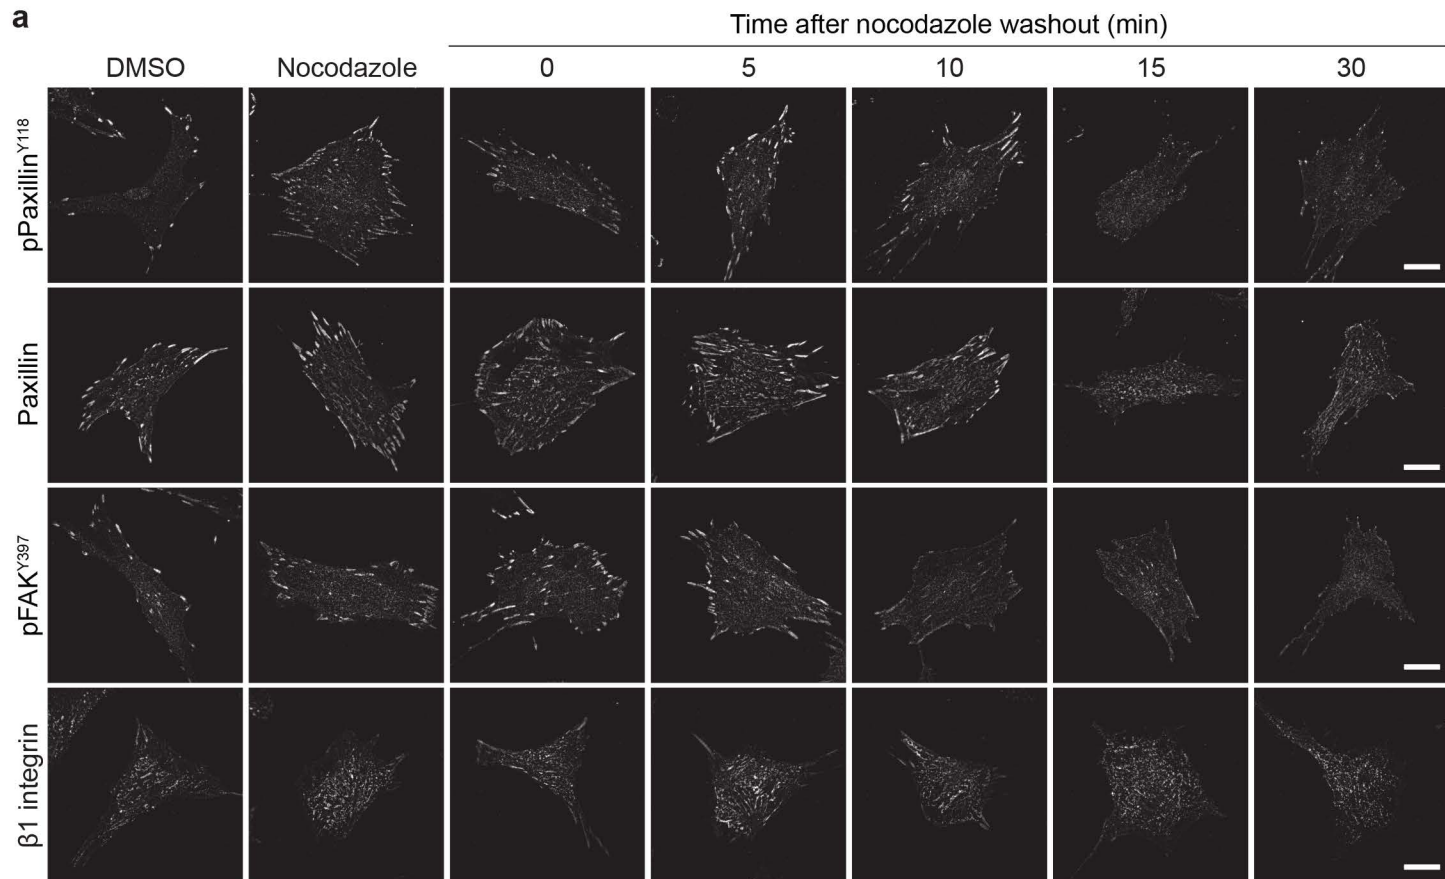

**b**

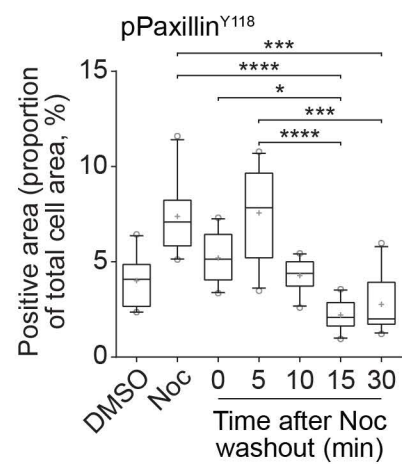

**c**

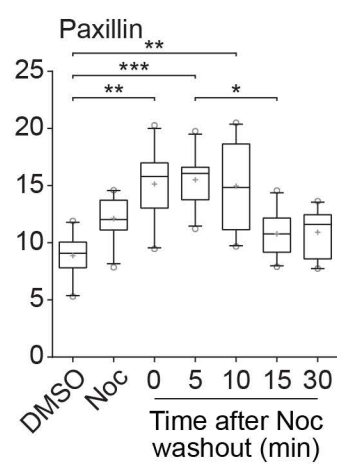

**d**

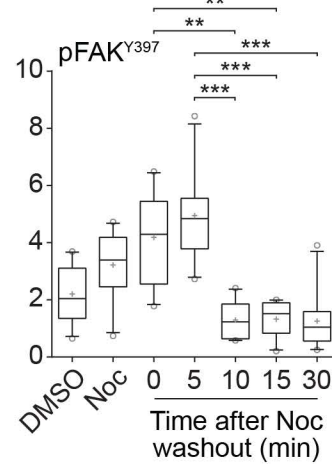

**e**

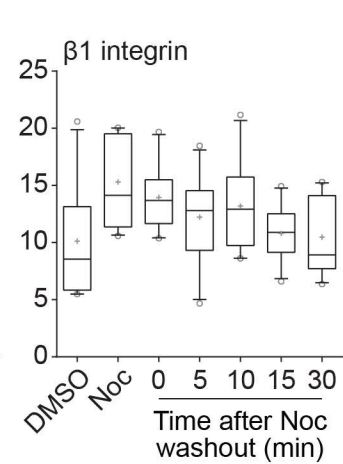

Supplement: NIHMS65191-supplement-Supplementary_Figure_7.pdf [file NIHMS65191-supplement-Supplementary_Figure_7.pdf]
